# Supplementary material for: Possible nitrogen fertilization of the early Earth Ocean by microbial continental ecosystems
Source: PubMed Central journal article supplement (PMC6023897; doi:10.1038/s41467-018-04995-y), 2018-06-28
Supplement: 41467_2018_4995_MOESM1_ESM.pdf [file 41467_2018_4995_MOESM1_ESM.pdf]

*Thomazo et al.* **Possible nitrogen fertilization of the early Earth Ocean by microbial continental ecosystems**

**Supplementary Table 1: Matrix of calculated N transport fluxes to underlying soil (Tmol yr<sup>-1</sup>) vs. percentage of colonized continental area for net N outputs fluxes varying from 0.0133 g N m<sup>-2</sup> yr<sup>-1</sup> to 8.820 g N m<sup>-2</sup> yr<sup>-1</sup>. The red values represent calculated result scaled to the modern export flux threshold.**

| Surface continent (km <sup>2</sup> ) |     | Net N outputs from crusts to subsurface soil (m <sup>2</sup> yr <sup>-1</sup> ) |       |       |       |       |       |       |       |       |       |       |       |       |       |       |       |       |       |       |       |       |       |       |       |       |       |       |       |       |       |       |        |        |        |
|--------------------------------------|-----|---------------------------------------------------------------------------------|-------|-------|-------|-------|-------|-------|-------|-------|-------|-------|-------|-------|-------|-------|-------|-------|-------|-------|-------|-------|-------|-------|-------|-------|-------|-------|-------|-------|-------|-------|--------|--------|--------|
| %                                    |     | 0.013                                                                           | 0.020 | 0.025 | 0.050 | 0.080 | 0.110 | 0.133 | 0.140 | 0.144 | 0.190 | 0.200 | 0.247 | 0.260 | 0.290 | 0.320 | 0.342 | 0.380 | 0.410 | 0.440 | 0.470 | 0.500 | 0.530 | 0.560 | 0.590 | 0.620 | 0.650 | 0.680 | 0.710 | 0.740 | 0.770 | 0.800 | 1.900  | 2.080  | 8.820  |
| 148647000                            | 100 | 0.141                                                                           | 0.212 | 0.265 | 0.531 | 0.849 | 1.167 | 1.412 | 1.486 | 1.528 | 2.016 | 2.123 | 2.621 | 2.759 | 3.078 | 3.396 | 3.630 | 4.033 | 4.351 | 4.670 | 4.988 | 5.307 | 5.625 | 5.943 | 6.262 | 6.580 | 6.899 | 7.217 | 7.535 | 7.854 | 8.172 | 8.490 | 20.165 | 22.075 | 93.607 |
| 133782300                            | 90  | 0.127                                                                           | 0.191 | 0.239 | 0.478 | 0.764 | 1.051 | 1.270 | 1.337 | 1.375 | 1.815 | 1.910 | 2.359 | 2.483 | 2.770 | 3.057 | 3.267 | 3.630 | 3.916 | 4.203 | 4.489 | 4.776 | 5.062 | 5.349 | 5.636 | 5.922 | 6.209 | 6.495 | 6.782 | 7.068 | 7.355 | 7.641 | 18.148 | 19.868 | 84.247 |
| 118917600                            | 80  | 0.113                                                                           | 0.170 | 0.212 | 0.425 | 0.679 | 0.934 | 1.129 | 1.189 | 1.223 | 1.613 | 1.698 | 2.097 | 2.208 | 2.462 | 2.717 | 2.904 | 3.226 | 3.481 | 3.736 | 3.991 | 4.245 | 4.500 | 4.755 | 5.009 | 5.264 | 5.519 | 5.774 | 6.028 | 6.283 | 6.538 | 6.792 | 16.132 | 17.660 | 74.886 |
| 104052900                            | 70  | 0.099                                                                           | 0.149 | 0.186 | 0.371 | 0.594 | 0.817 | 0.988 | 1.040 | 1.070 | 1.412 | 1.486 | 1.835 | 1.932 | 2.154 | 2.377 | 2.541 | 2.823 | 3.046 | 3.269 | 3.492 | 3.715 | 3.937 | 4.160 | 4.383 | 4.606 | 4.829 | 5.052 | 5.275 | 5.498 | 5.720 | 5.943 | 14.115 | 15.453 | 65.164 |
| 89188200                             | 60  | 0.085                                                                           | 0.127 | 0.159 | 0.318 | 0.509 | 0.700 | 0.847 | 0.891 | 0.917 | 1.210 | 1.274 | 1.573 | 1.656 | 1.847 | 2.038 | 2.178 | 2.420 | 2.611 | 2.802 | 2.993 | 3.184 | 3.375 | 3.566 | 3.757 | 3.948 | 4.139 | 4.330 | 4.521 | 4.712 | 4.903 | 5.094 | 12.099 | 13.245 | 56.164 |
| 74323500                             | 50  | 0.071                                                                           | 0.106 | 0.133 | 0.265 | 0.425 | 0.584 | 0.706 | 0.743 | 0.764 | 1.008 | 1.061 | 1.311 | 1.380 | 1.539 | 1.698 | 1.815 | 2.016 | 2.176 | 2.335 | 2.494 | 2.653 | 2.812 | 2.972 | 3.131 | 3.290 | 3.449 | 3.608 | 3.768 | 3.927 | 4.086 | 4.245 | 10.082 | 11.038 | 46.804 |
| 59458800                             | 40  | 0.056                                                                           | 0.085 | 0.106 | 0.212 | 0.340 | 0.467 | 0.565 | 0.594 | 0.611 | 0.807 | 0.849 | 1.049 | 1.104 | 1.231 | 1.358 | 1.452 | 1.613 | 1.741 | 1.868 | 1.995 | 2.123 | 2.250 | 2.377 | 2.505 | 2.632 | 2.759 | 2.887 | 3.014 | 3.141 | 3.269 | 3.396 | 8.066  | 8.830  | 37.443 |
| 44594100                             | 30  | 0.042                                                                           | 0.064 | 0.080 | 0.159 | 0.255 | 0.350 | 0.423 | 0.446 | 0.458 | 0.605 | 0.637 | 0.786 | 0.828 | 0.923 | 1.019 | 1.089 | 1.210 | 1.305 | 1.401 | 1.496 | 1.592 | 1.687 | 1.783 | 1.879 | 1.974 | 2.070 | 2.165 | 2.261 | 2.356 | 2.452 | 2.547 | 6.049  | 6.623  | 28.082 |
| 29729400                             | 20  | 0.028                                                                           | 0.042 | 0.053 | 0.106 | 0.170 | 0.233 | 0.282 | 0.297 | 0.306 | 0.403 | 0.425 | 0.524 | 0.552 | 0.616 | 0.679 | 0.726 | 0.807 | 0.870 | 0.934 | 0.998 | 1.061 | 1.125 | 1.189 | 1.252 | 1.316 | 1.380 | 1.443 | 1.507 | 1.571 | 1.634 | 1.698 | 4.033  | 4.415  | 18.721 |
| 25269900                             | 17  | 0.024                                                                           | 0.036 | 0.045 | 0.090 | 0.144 | 0.198 | 0.240 | 0.253 | 0.260 | 0.343 | 0.361 | 0.446 | 0.469 | 0.523 | 0.577 | 0.617 | 0.686 | 0.740 | 0.794 | 0.848 | 0.902 | 0.956 | 1.010 | 1.064 | 1.119 | 1.173 | 1.227 | 1.281 | 1.335 | 1.389 | 1.443 | 3.428  | 3.753  | 15.913 |
| 14864700                             | 10  | 0.014                                                                           | 0.021 | 0.027 | 0.053 | 0.085 | 0.117 | 0.141 | 0.149 | 0.153 | 0.202 | 0.212 | 0.262 | 0.276 | 0.308 | 0.340 | 0.363 | 0.403 | 0.435 | 0.467 | 0.499 | 0.531 | 0.562 | 0.594 | 0.626 | 0.658 | 0.690 | 0.722 | 0.754 | 0.785 | 0.817 | 0.849 | 2.016  | 2.208  | 9.361  |
| 13378230                             | 9   | 0.013                                                                           | 0.019 | 0.024 | 0.048 | 0.076 | 0.105 | 0.127 | 0.134 | 0.138 | 0.181 | 0.191 | 0.236 | 0.248 | 0.277 | 0.306 | 0.327 | 0.363 | 0.392 | 0.420 | 0.449 | 0.478 | 0.506 | 0.535 | 0.564 | 0.592 | 0.621 | 0.650 | 0.678 | 0.707 | 0.735 | 0.764 | 1.815  | 1.987  | 8.425  |
| 11891760                             | 8   | 0.011                                                                           | 0.017 | 0.021 | 0.042 | 0.068 | 0.093 | 0.113 | 0.119 | 0.122 | 0.151 | 0.170 | 0.210 | 0.221 | 0.246 | 0.272 | 0.290 | 0.323 | 0.348 | 0.374 | 0.399 | 0.425 | 0.450 | 0.475 | 0.501 | 0.526 | 0.552 | 0.577 | 0.603 | 0.628 | 0.654 | 0.679 | 1.613  | 1.766  | 7.489  |
| 10405290                             | 7   | 0.010                                                                           | 0.015 | 0.019 | 0.037 | 0.059 | 0.082 | 0.099 | 0.104 | 0.107 | 0.141 | 0.149 | 0.180 | 0.193 | 0.215 | 0.238 | 0.254 | 0.282 | 0.305 | 0.327 | 0.349 | 0.371 | 0.394 | 0.416 | 0.438 | 0.461 | 0.483 | 0.507 | 0.529 | 0.552 | 0.574 | 1.412 | 1.545  | 6.553  |        |
| 89188200                             | 6   | 0.008                                                                           | 0.013 | 0.016 | 0.032 | 0.051 | 0.070 | 0.085 | 0.089 | 0.092 | 0.121 | 0.127 | 0.157 | 0.166 | 0.185 | 0.204 | 0.218 | 0.242 | 0.261 | 0.280 | 0.299 | 0.318 | 0.337 | 0.357 | 0.376 | 0.395 | 0.414 | 0.433 | 0.452 | 0.471 | 0.490 | 0.509 | 1.210  | 1.325  | 5.616  |
| 74323500                             | 5   | 0.007                                                                           | 0.011 | 0.013 | 0.027 | 0.042 | 0.058 | 0.071 | 0.074 | 0.076 | 0.101 | 0.106 | 0.131 | 0.138 | 0.154 | 0.170 | 0.181 | 0.202 | 0.218 | 0.233 | 0.249 | 0.265 | 0.281 | 0.297 | 0.313 | 0.329 | 0.345 | 0.361 | 0.377 | 0.393 | 0.409 | 0.425 | 1.008  | 1.104  | 4.680  |
| 59458800                             | 4   | 0.006                                                                           | 0.008 | 0.011 | 0.021 | 0.034 | 0.047 | 0.056 | 0.059 | 0.061 | 0.081 | 0.085 | 0.105 | 0.110 | 0.123 | 0.136 | 0.145 | 0.161 | 0.174 | 0.187 | 0.200 | 0.212 | 0.225 | 0.238 | 0.250 | 0.263 | 0.276 | 0.289 | 0.301 | 0.314 | 0.327 | 0.340 | 0.807  | 0.883  | 3.744  |
| 44594100                             | 3   | 0.004                                                                           | 0.006 | 0.008 | 0.016 | 0.025 | 0.035 | 0.042 | 0.045 | 0.046 | 0.060 | 0.064 | 0.079 | 0.083 | 0.092 | 0.102 | 0.109 | 0.121 | 0.131 | 0.140 | 0.150 | 0.159 | 0.169 | 0.178 | 0.188 | 0.197 | 0.207 | 0.217 | 0.226 | 0.236 | 0.245 | 0.255 | 0.605  | 0.662  | 2.808  |
| 29729400                             | 2   | 0.003                                                                           | 0.004 | 0.005 | 0.011 | 0.017 | 0.023 | 0.028 | 0.030 | 0.031 | 0.040 | 0.042 | 0.052 | 0.055 | 0.062 | 0.068 | 0.073 | 0.081 | 0.087 | 0.093 | 0.100 | 0.106 | 0.112 | 0.119 | 0.125 | 0.132 | 0.138 | 0.144 | 0.151 | 0.157 | 0.163 | 0.170 | 0.403  | 0.442  | 1.872  |
| 14864700                             | 1   | 0.001                                                                           | 0.002 | 0.003 | 0.005 | 0.008 | 0.012 | 0.014 | 0.015 | 0.015 | 0.020 | 0.021 | 0.026 | 0.028 | 0.031 | 0.034 | 0.036 | 0.040 | 0.044 | 0.047 | 0.050 | 0.053 | 0.056 | 0.059 | 0.063 | 0.066 | 0.069 | 0.072 | 0.075 | 0.079 | 0.082 | 0.085 | 0.202  | 0.221  | 0.936  |
| 0                                    | 0   | 0.000                                                                           | 0.000 | 0.000 | 0.000 | 0.000 | 0.000 | 0.000 | 0.000 | 0.000 | 0.000 | 0.000 | 0.000 | 0.000 | 0.000 | 0.000 | 0.000 | 0.000 | 0.000 | 0.000 | 0.000 | 0.000 | 0.000 | 0.000 | 0.000 | 0.000 | 0.000 | 0.000 | 0.000 | 0.000 | 0.000 | 0.000 | 0.000  | 0.000  | 0.000  |

  

| Surface continent (km <sup>2</sup> ) |     | Net N outputs from crusts to subsurface soil (m <sup>2</sup> yr <sup>-1</sup> ) |       |       |       |       |       |       |       |       |       |       |       |       |       |       |       |       |       |       |       |       |       |       |       |       |       |       |       |       |       |       |        |        |        |
|--------------------------------------|-----|---------------------------------------------------------------------------------|-------|-------|-------|-------|-------|-------|-------|-------|-------|-------|-------|-------|-------|-------|-------|-------|-------|-------|-------|-------|-------|-------|-------|-------|-------|-------|-------|-------|-------|-------|--------|--------|--------|
| %                                    |     | 0.013                                                                           | 0.020 | 0.025 | 0.050 | 0.080 | 0.110 | 0.133 | 0.140 | 0.144 | 0.190 | 0.200 | 0.247 | 0.260 | 0.290 | 0.320 | 0.342 | 0.380 | 0.410 | 0.440 | 0.470 | 0.500 | 0.530 | 0.560 | 0.590 | 0.620 | 0.650 | 0.680 | 0.710 | 0.740 | 0.770 | 0.800 | 2.500  | 2.080  | 8.820  |
| 89188200                             | 100 | 0.085                                                                           | 0.127 | 0.159 | 0.318 | 0.509 | 0.700 | 0.847 | 0.891 | 0.917 | 1.210 | 1.274 | 1.573 | 1.656 | 1.847 | 2.038 | 2.178 | 2.420 | 2.611 | 2.802 | 2.993 | 3.184 | 3.375 | 3.566 | 3.757 | 3.948 | 4.139 | 4.330 | 4.521 | 4.712 | 4.903 | 5.094 | 12.099 | 13.245 | 56.164 |
| 80269380                             | 90  | 0.076                                                                           | 0.115 | 0.143 | 0.287 | 0.458 | 0.630 | 0.762 | 0.802 | 0.825 | 1.089 | 1.146 | 1.416 | 1.490 | 1.662 | 1.834 | 1.960 | 2.178 | 2.350 | 2.522 | 2.694 | 2.866 | 3.037 | 3.209 | 3.381 | 3.553 | 3.725 | 3.897 | 4.069 | 4.241 | 4.413 | 4.585 | 10.889 | 11.921 | 50.548 |
| 71550560                             | 80  | 0.068                                                                           | 0.102 | 0.127 | 0.255 | 0.408 | 0.560 | 0.678 | 0.713 | 0.734 | 0.968 | 1.019 | 1.258 | 1.325 | 1.477 | 1.630 | 1.742 | 1.936 | 2.089 | 2.241 | 2.394 | 2.547 | 2.700 | 2.853 | 3.006 | 3.158 | 3.311 | 3.464 | 3.617 | 3.770 | 3.923 | 4.075 | 9.679  | 10.596 | 44.932 |
| 62431740                             | 70  | 0.059                                                                           | 0.089 | 0.111 | 0.223 | 0.357 | 0.490 | 0.593 | 0.624 | 0.642 | 0.847 | 0.891 | 1.101 | 1.159 | 1.293 | 1.426 | 1.524 | 1.694 | 1.828 | 1.961 | 2.095 | 2.229 | 2.362 | 2.496 | 2.630 | 2.764 | 2.897 | 3.031 | 3.165 | 3.299 | 3.432 | 3.566 | 8.469  | 9.272  | 39.315 |
| 53512920                             | 60  | 0.051                                                                           | 0.076 | 0.096 | 0.191 | 0.306 | 0.420 | 0.508 | 0.535 | 0.550 | 0.726 | 0.764 | 0.944 | 0.993 | 1.108 | 1.223 | 1.307 | 1.452 | 1.566 | 1.681 | 1.796 | 1.910 | 2.025 | 2.140 | 2.254 | 2.369 | 2.483 | 2.598 | 2.713 | 2.827 | 2.942 | 3.057 | 7.259  | 7.947  | 33.699 |
| 44594100                             | 50  | 0.042                                                                           | 0.064 | 0.080 | 0.159 | 0.255 | 0.350 | 0.423 | 0.446 | 0.458 | 0.605 | 0.637 | 0.786 | 0.828 | 0.923 | 1.019 | 1.089 | 1.210 | 1.305 | 1.401 | 1.496 | 1.592 | 1.687 | 1.783 | 1.879 | 1.974 | 2.070 | 2.165 | 2.261 | 2.356 | 2.452 | 2.547 | 6.049  | 6.623  | 28.082 |
| 35675280                             | 40  | 0.034                                                                           | 0.051 | 0.064 | 0.127 | 0.204 | 0.280 | 0.339 | 0.357 | 0.367 | 0.484 | 0.509 | 0.629 | 0.662 | 0.739 | 0.815 | 0.871 | 0.968 | 1.044 | 1.121 | 1.197 | 1.274 | 1.350 | 1.426 | 1.503 | 1.579 | 1.656 | 1.732 | 1.808 | 1.885 | 1.961 | 2.03  |        |        |        |

### Supplementary references:

1. Johnson, S. L., Neuer, S., Garcia-Pichel., F. Export of nitrogenous compounds due to incomplete cycling within biological soil crusts of arid lands *Environ. Microbiol.* **9**, 680 (2007).
2. Thiet, R. K., Boerner, R. E., Nagy, M. & Jardine, R. The effect of biological soil crusts on throughput of rainwater and N into Lake Michigan sand dune soils. *Plant and soil* **278**, 235-251 (2005).
3. Rychert, R. C. & Skujins, J. Nitrogen fixation by blue-green algae-lichen crusts in the Great Basin Desert. *Soil Sci. Soc. Am. Proc.* **38**, 768–771 (1974).
4. West, N.E. & Skujins, J. The nitrogen cycle in North American cold-winter semi-desert ecosystems. *Oecologia* **12**, 45–53 (1977).
5. Evans, R.D. & Johansen, J.R. Microbiotic crusts and ecosystem processes. *Crit. Rev. Plant Sci.* **18**, 183–225 (1999).
6. Rychert, R.C., Skukins, J., Sorensen, D. & Porcella, D. Nitrogen fixation by lichens and free-living microorganisms in deserts. In: *Nitrogen in Desert Ecosystems* Dowden. Ed. N E J J West Skujins pp. 20–30. Hutchinson, and Ross, Inc, Stroudsburg (1978).
7. Evans, R.D. & Lange, O.L. Biological soil crusts and ecosystem nitrogen and carbon dynamics. In: *Biological Soil Crusts: Structure, Function, and Management, Ecological Studies*, Vol. 150. Eds. J Belnap and O L Lange pp. 264–279. Springer-Verlag, Berlin. (2001)
8. Belnap, J. Nitrogen fixation in biological soil crusts from southeast Utah, USA. *Biol. Fertil. Soils* **35**, 128–135 (2002).
9. Belnap, J. Impacts of off road vehicles on nitrogen cycles in biological soil crusts: resistance in different US deserts. *J. Arid Environ.* **52**, 155–165 (2002).

10. Russow, R., Veste, M. & Böhme, F. A natural  $^{15}\text{N}$  approach to determine the biological fixation of atmospheric nitrogen by biological soil crusts of the Negev Desert. *Rapid Commun. Mass Spectrom.* **19**, 3451–3456 (2005).
11. Stewart, K.J., Coxson, D. & Grogan, P. Nitrogen inputs by associative cyanobacteria across a low arctic tundra landscape. *Arct. Antarct. Alp. Res.* **43**, 267–278. (2011)
12. Stewart, K.J., Coxson, D. & Siciliano, S.D. Small-scale spatial patterns in  $\text{N}_2$ -fixation and nutrient availability in an arctic hummock–hollow ecosystem. *Soil Biol. Biochem.* **43**, 133–140 (2011).
13. Stewart, K.J., Lamb, E.G., Coxson, D.S. & Siciliano, S.D. Bryophyte-cyanobacterial associations as a key factor in  $\text{N}_2$ -fixation across the Canadian Arctic. *Plant Soil* **344**, 335–346 (2011)
14. Caputa, K., Coxson, D. & Sanborn, P. Seasonal patterns of nitrogen fixation in biological soil crusts from British Columbia’s Chilcotin grasslands. *Botany* **641**, 631–641 (2013).
15. Elbert, W. et al. Contribution of cryptogamic covers to the global cycles of carbon and nitrogen. *Nature Geosci.* **5**, 459–462 (2012).
